# Supplementary material for: Enhanced photocatalytic properties of ZnO nanorods by electrostatic self-assembly with reduced graphene oxide
Source: Royal Society of Chemistry journal article supplement (doi:10.1039/c7cp06909j), 2018-01-01
Supplement: c7cp06909j1.pdf [file c7cp06909j1.pdf]

## **Enhanced photocatalytic properties of ZnO nanorods by electrostatic self-assembly with reduced graphene oxide**

Fengzhi Wang, Yusong Zhou, Xinhua Pan\*, Bin Lu, Jingyun Huang, Zhizhen Ye

State Key Laboratory of Silicon Materials, School of Materials Science and Engineering, Zhejiang University, Hangzhou 310027, People's Republic of China

### **CONTENTS**

Fig. S1. SEM images of samples with different rGO contents: (a) 1%; (b) 5%; (c) 10%; (d) 20%.

Fig. S2. Remaining pollutants after reaching the adsorption-desorption equilibrium: (a) RhB; (b) phenol.

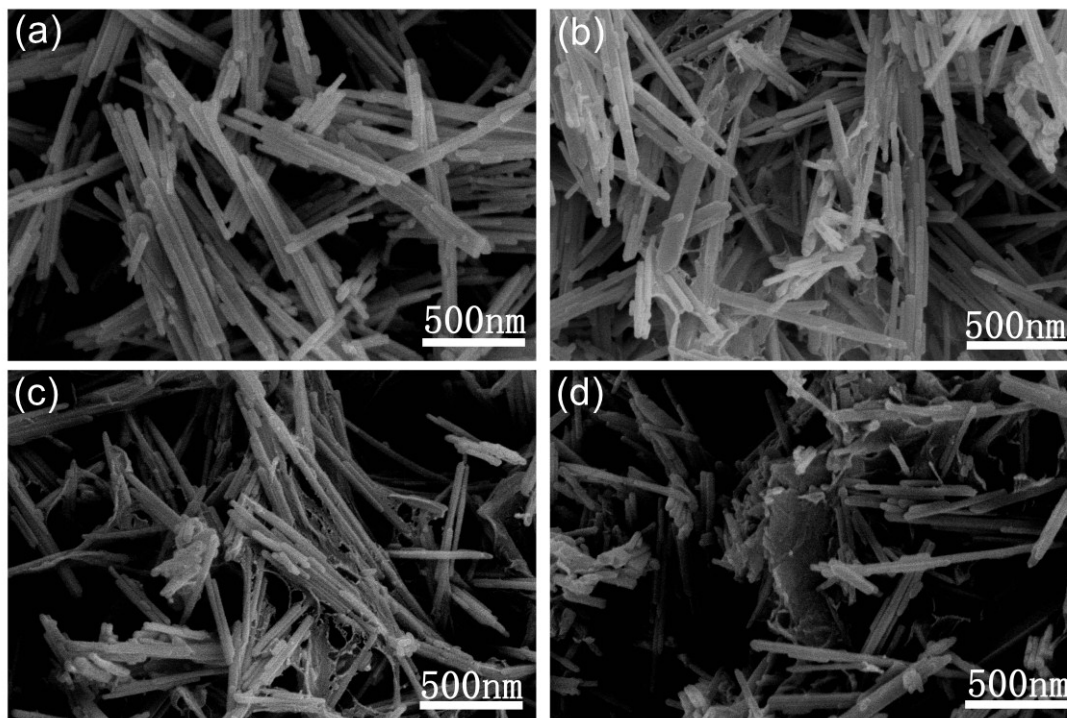

Fig. S1. SEM images of samples with different rGO contents: (a) 1%; (b) 5%; (c) 10%; (d) 20%.

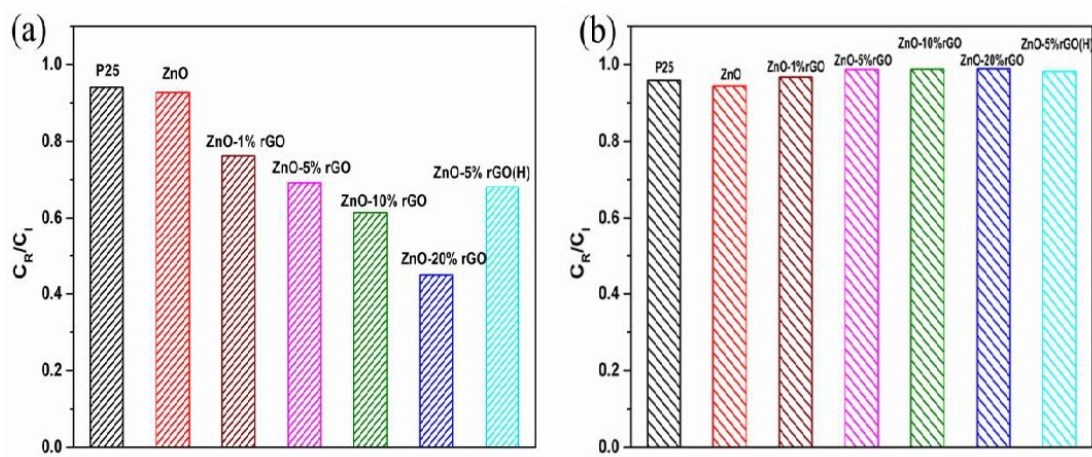

Fig. S2. Remaining pollutants after reaching the adsorption-desorption equilibrium: (a) RhB; (b) phenol.
